# Supplementary material for: Focusing manipulation of microalgae in a microfluidic device using self-produced macromolecules
Source: Royal Society of Chemistry journal article supplement (doi:10.1039/c7lc01324h), 2018-01-01
Supplement: c7lc01324h1.pdf [file c7lc01324h1.pdf]

# Lab on a Chip

## **Focusing Manipulation of microalgae in a microfluidic device using self-produced macromolecules**

Min Jung Kim<sup>1</sup>, Jae Ryoung Youn<sup>1,\*</sup> and Young Seok Song<sup>2,\*</sup>

<sup>1</sup> *Research Institute of Advanced Materials (RIAM),  
Department of Materials Science and Engineering, Seoul National University,  
Seoul 08826, Korea*

<sup>2</sup> *Department of Fiber System Engineering, Dankook University,  
Gyeonggi-do 16890, Korea*

\*Corresponding author: Jae Ryoung Youn and Young Seok Song  
Tel.: +82-2-880-8326; Fax: +82-2-885-9671; E-mail: jaeryoun@snu.ac.kr  
Tel.: +82-31-8005-3567; Fax: +82-31-8005-2209; E-mail: ysong@dankook.ac.kr

**This PDF file includes:**

Figs. S1 to S6

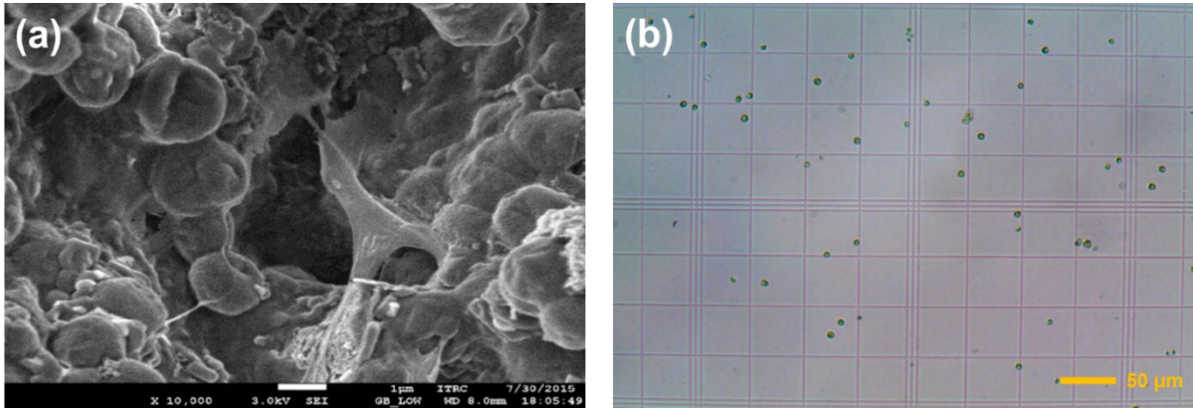

**Supplementary Figure S1.** (a) Scanning electron micrograph of *Chlorella vulgaris* in biofilm. The scale bar denotes a length of 1 μm. (b) Microscopic view of *Chlorella vulgaris*. The scale bar denotes a length of 50 μm.

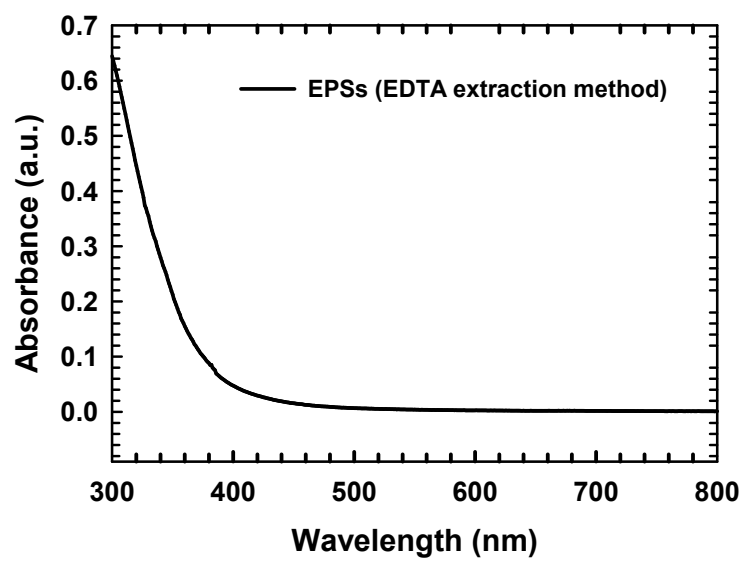

**Supplementary Fig. S2** UV-Vis spectra of EPSs extracted from EDTA method.

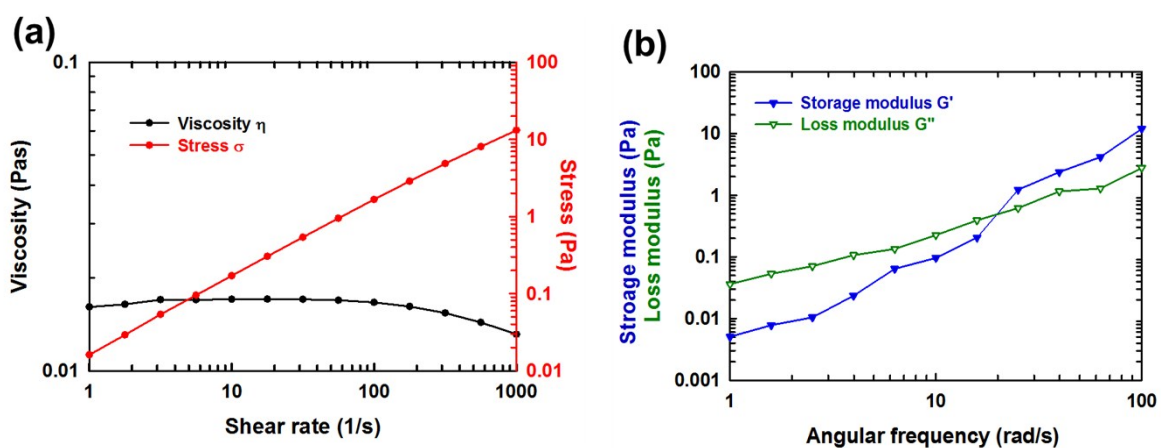

**Supplementary Figure S3.** Rheological measurements of 0.9 wt% PEO solution. (a) Viscosity and shear stress in the range of shear rate from 1 to 1000  $\text{s}^{-1}$ . (b) Storage modulus ( $G'$ ) and loss modulus ( $G''$ ) as a function of angular frequency.

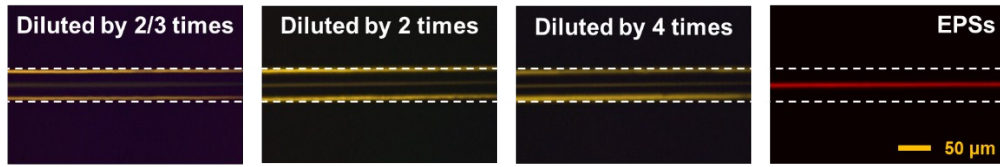

**Supplementary Figure S4.** Particle behavior of the different concentration of EPSs at a position of 5cm downstream from the inlet for 6.27  $\mu\text{m}$  fluorescent PS particles with a flow rate of 50  $\mu\text{l/hr}$  ( $Re = 0.0191$ ,  $Wi = 22.2$ ). The scale bar is 50  $\mu\text{m}$ .

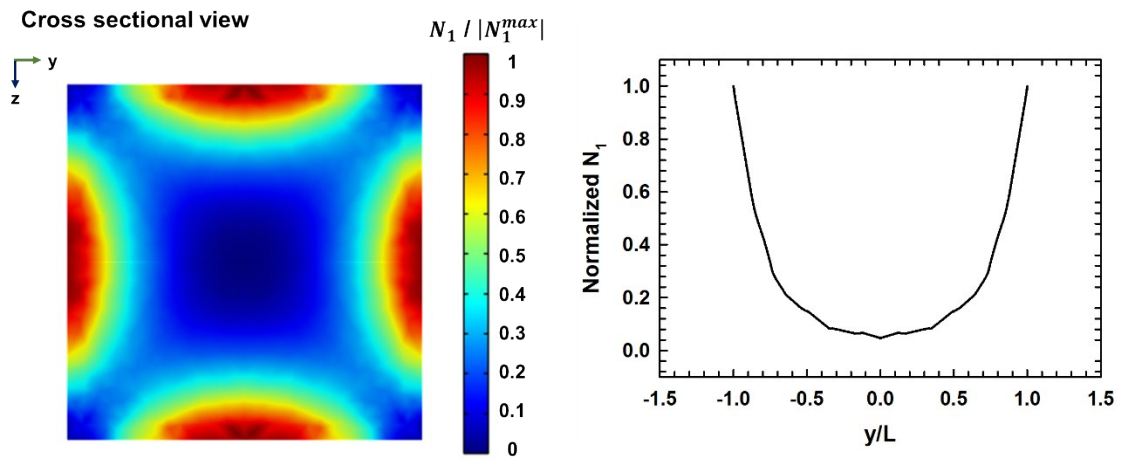

**Supplementary Figure S5.** Numerical simulation of the first normal stress difference ( $N_1$ ). The value of the normalized  $N_1$  shows symmetry at the cross-section of the channel.

(a)

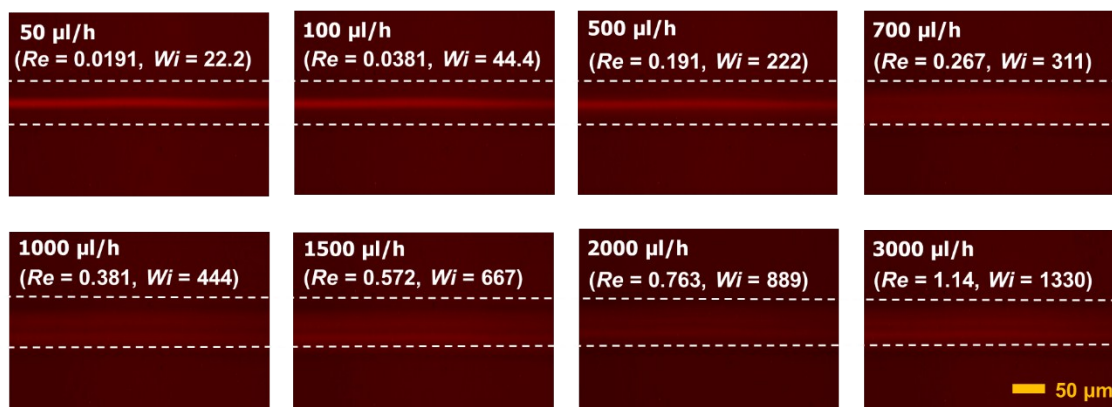

(b)

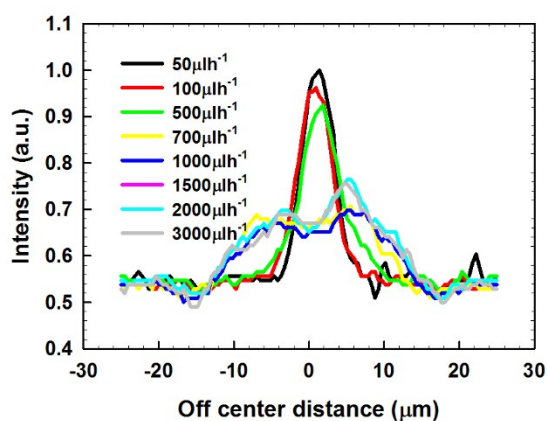

**Supplementary Figure S6.** (a) Particle focusing behavior of the 0.9 wt% of PEO solution in a straight channel at flow rates of 50 - 3000  $\mu\text{l/hr}$  ( $Re=0.0191-1.14, Wi=22.2-1330$ ). The scale bar is 50  $\mu\text{m}$ . (b) Probability distribution function of PS particles under flow rates of 50 - 3000  $\mu\text{l/hr}$  ( $Re=0.0191-1.14, Wi=22.2-1330$ ).
